# Supplementary material
Source: Research Square preprint supplement (doi:10.21203/rs.3.rs-8982883/v1)
Supplement: Supplementary file 1 [file 5ac57ae3ba4564ea58790194.xlsx]

## Sheet: Supplementary Table 5
	Hgb		WBC		Plt		MCV
Holm-Sidak's multiple comparison test	Adjusted P		Adjusted P		Adjusted P		Adjusted P
2 months
Wild-type vs. VISTA KO	ns	0.4862	ns	0.2378	ns	0.7235	ns	0.9169
Wild-type vs. NHD13Tg/VISTA WT	ns	0.6566	***	0.0007	ns	0.1305	ns	0.8837
Wild-type vs. NHD13Tg/VISTA KO	ns	0.6566	**	0.0018	**	0.0087	ns	0.3019
VISTA KO vs. NHD13Tg/VISTA WT	ns	0.6566	***	0.0003	ns	0.6107	ns	0.9169
VISTA KO vs. NHD13Tg/VISTA KO	ns	0.1606	***	0.0007	ns	0.3202	ns	0.8025
NHD13Tg/VISTA WT vs. NHD13Tg/VISTA KO	ns	0.4862	ns	0.5486	ns	0.7235	ns	0.8025
3 months
Wild-type vs. VISTA KO	ns	0.4248	**	0.0013	*	0.021	ns	0.8681
Wild-type vs. NHD13Tg/VISTA WT	ns	0.1725	****	<0.0001	ns	0.2099	*	0.0331
Wild-type vs. NHD13Tg/VISTA KO	ns	0.1292	****	<0.0001	*	0.028	ns	0.0563
VISTA KO vs. NHD13Tg/VISTA WT	*	0.0176	****	<0.0001	***	0.0001	*	0.0331
VISTA KO vs. NHD13Tg/VISTA KO	**	0.0077	****	<0.0001	****	<0.0001	ns	0.0563
NHD13Tg/VISTA WT vs. NHD13Tg/VISTA KO	ns	0.9227	ns	0.6161	ns	0.3987	ns	0.8351
4 months
Wild-type vs. VISTA KO	**	0.0013	ns	0.0514	ns	0.6142	ns	0.1328
Wild-type vs. NHD13Tg/VISTA WT	**	0.0074	****	<0.0001	*	0.0398	***	0.001
Wild-type vs. NHD13Tg/VISTA KO	ns	0.611	****	<0.0001	***	0.0002	**	0.0015
VISTA KO vs. NHD13Tg/VISTA WT	****	<0.0001	****	<0.0001	ns	0.1295	****	<0.0001
VISTA KO vs. NHD13Tg/VISTA KO	***	0.0002	****	<0.0001	**	0.003	****	<0.0001
NHD13Tg/VISTA WT vs. NHD13Tg/VISTA KO	*	0.0163	ns	0.8182	ns	0.3832	ns	0.6131
5 months
Wild-type vs. VISTA KO	*	0.0387	ns	0.0509	****	<0.0001	ns	0.6682
Wild-type vs. NHD13Tg/VISTA WT	****	<0.0001	***	0.0001	ns	0.6934	****	<0.0001
Wild-type vs. NHD13Tg/VISTA KO	*	0.0261	***	0.0001	ns	0.7352	****	<0.0001
VISTA KO vs. NHD13Tg/VISTA WT	****	<0.0001	****	<0.0001	****	<0.0001	****	<0.0001
VISTA KO vs. NHD13Tg/VISTA KO	****	<0.0001	****	<0.0001	****	<0.0001	****	<0.0001
NHD13Tg/VISTA WT vs. NHD13Tg/VISTA KO	**	0.0074	ns	0.6155	ns	0.6116	ns	0.6682
6 months
Wild-type vs. VISTA KO	**	0.0082	ns	0.6482	ns	0.8297	ns	0.082
Wild-type vs. NHD13Tg/VISTA WT	****	<0.0001	***	0.0001	**	0.0022	****	<0.0001
Wild-type vs. NHD13Tg/VISTA KO	**	0.0015	****	<0.0001	**	0.001	****	<0.0001
VISTA KO vs. NHD13Tg/VISTA WT	****	<0.0001	****	<0.0001	***	0.0009	****	<0.0001
VISTA KO vs. NHD13Tg/VISTA KO	****	<0.0001	****	<0.0001	***	0.0003	****	<0.0001
NHD13Tg/VISTA WT vs. NHD13Tg/VISTA KO	*	0.019	ns	0.9809	ns	0.9534	**	0.0092
7 months
Wild-type vs. VISTA KO	*	0.0221	ns	0.1478	ns	0.6591	ns	0.3292
Wild-type vs. NHD13Tg/VISTA WT	****	<0.0001	*	0.0196	**	0.0042	****	<0.0001
Wild-type vs. NHD13Tg/VISTA KO	****	<0.0001	***	0.0006	****	<0.0001	****	<0.0001
VISTA KO vs. NHD13Tg/VISTA WT	****	<0.0001	***	0.0001	**	0.0017	****	<0.0001
VISTA KO vs. NHD13Tg/VISTA KO	****	<0.0001	****	<0.0001	****	<0.0001	****	<0.0001
NHD13Tg/VISTA WT vs. NHD13Tg/VISTA KO	**	0.0054	ns	0.5036	ns	0.574	**	0.005
8 months
Wild-type vs. VISTA KO	ns	0.2397	ns	0.4685	ns	0.5179	ns	0.1209
Wild-type vs. NHD13Tg/VISTA WT	****	<0.0001	ns	0.7259	ns	0.339	****	<0.0001
Wild-type vs. NHD13Tg/VISTA KO	****	<0.0001	*	0.0106	ns	0.5179	****	<0.0001
VISTA KO vs. NHD13Tg/VISTA WT	****	<0.0001	ns	0.3877	*	0.0249	****	<0.0001
VISTA KO vs. NHD13Tg/VISTA KO	****	<0.0001	****	<0.0001	*	0.0466	****	<0.0001
NHD13Tg/VISTA WT vs. NHD13Tg/VISTA KO	***	0.0001	*	0.0392	ns	0.5612	ns	0.4911
9 months
Wild-type vs. VISTA KO	ns	0.0897	ns	0.5945	ns	0.5967	ns	0.1477
Wild-type vs. NHD13Tg/VISTA WT	****	<0.0001	*	0.0334	ns	0.4436	****	<0.0001
Wild-type vs. NHD13Tg/VISTA KO	****	<0.0001	ns	0.5202	ns	0.5709	****	<0.0001
VISTA KO vs. NHD13Tg/VISTA WT	****	<0.0001	ns	0.1224	ns	0.1207	****	<0.0001
VISTA KO vs. NHD13Tg/VISTA KO	****	<0.0001	ns	0.6706	ns	0.1218	****	<0.0001
NHD13Tg/VISTA WT vs. NHD13Tg/VISTA KO	ns	0.0897	ns	0.2457	ns	0.5967	ns	0.0506
10 months
Wild-type vs. VISTA KO	ns	0.5639	ns	0.6453	ns	0.9825	ns	0.1351
Wild-type vs. NHD13Tg/VISTA WT	****	<0.0001	ns	0.6453	ns	0.5275	***	0.0002
Wild-type vs. NHD13Tg/VISTA KO	****	<0.0001	ns	0.6428	ns	0.4828	****	<0.0001
VISTA KO vs. NHD13Tg/VISTA WT	****	<0.0001	ns	0.4023	ns	0.4991	****	<0.0001
VISTA KO vs. NHD13Tg/VISTA KO	****	<0.0001	ns	0.7844	ns	0.3138	****	<0.0001
NHD13Tg/VISTA WT vs. NHD13Tg/VISTA KO	ns	0.7137	ns	0.3869	ns	0.9825	*	0.0112
11 months
Wild-type vs. VISTA KO	ns	0.5309	ns	0.0576	ns	0.5036	ns	0.1245
Wild-type vs. NHD13Tg/VISTA WT	****	<0.0001	****	<0.0001	*	0.0108	**	0.0012
Wild-type vs. NHD13Tg/VISTA KO	****	<0.0001	***	0.0006	ns	0.0503	****	<0.0001
VISTA KO vs. NHD13Tg/VISTA WT	****	<0.0001	***	0.0004	**	0.0028	****	<0.0001
VISTA KO vs. NHD13Tg/VISTA KO	****	<0.0001	ns	0.0534	**	0.0063	****	<0.0001
NHD13Tg/VISTA WT vs. NHD13Tg/VISTA KO	ns	0.1855	ns	0.0534	ns	0.2889	*	0.0204
12 months
Wild-type vs. VISTA KO	ns	0.1228	ns	0.8994	ns	0.9604	*	0.0391
Wild-type vs. NHD13Tg/VISTA WT	ns	0.0787	ns	0.925	ns	0.5565	*	0.0268
Wild-type vs. NHD13Tg/VISTA KO	****	<0.0001	ns	0.6921	ns	0.8419	****	<0.0001
VISTA KO vs. NHD13Tg/VISTA WT	**	0.0064	ns	0.9603	ns	0.5565	***	0.0007
VISTA KO vs. NHD13Tg/VISTA KO	****	<0.0001	ns	0.8994	ns	0.8419	****	<0.0001
NHD13Tg/VISTA WT vs. NHD13Tg/VISTA KO	ns	0.1228	ns	0.9135	ns	0.8419	*	0.0391
